# Supplementary material for: Apoptotic and anti-proliferative activity of novel platinum complex [Pt((E)-N-((E)-4-hydroxy-3-methoxybenzylidene)-2- (pyridine-2-ylmethylene)hydrazine-1-carbothioamide)] against Ehrlich Ascites carcinoma (EAC) cells in vivo
Source: Research Square preprint supplement (doi:10.21203/rs.3.rs-7229944/v1), 2025-09-29

**Supplementary Information (SI 1).** List of primers used for gene expression analysis.

| **Gene name** | **Primer sequence** | **Generating band** |
| --- | --- | --- |
| GAPDH | Forward: (5'-GTGGAAGGACTCATGACCACAG-3')  Reverse: (3'-CTGGTGCTCAGTGTAGCCCAG-5') | 0.475 kb |
| P53 | Forward: (5'-GCGTCTTAGAGACAGTTGCCT-3')  Reverse: (3'-GGATAGGTCGGCGGTTCATGC-5') | 0.458kb |
| Bax | Forward: (5'-GGCCCACCAGCTCTGAGCAGA-3')  Reverse:(3'-GCCACGTGGGCGTCCCAAAGT-5') | 0.479 kb |
| Bcl-2 | Forward: (5'-GTGGAGGAGCTCTTCAGGGA-3')  Reverse: (3'-AGGCACCCAGGGTGATGCAA-5') | 0.304 kb |
| Caspase-3 | Forward: (5'-TGG ACTGTGGCATTGAGACAG-3')  Reverse: (3'- CGACCCGTCCTTTGAATTTC-5') | 0.137 kb |
| Caspase-9 | Forward: 5′-GCTGCCTGAGAAGTACAAAGA-3′  Reverse: 3′-TCGTTGGGCAGGTTCTTATC-5′ | 0.487 kb |

**Supplementary Information (SI 2)**. **IR spectral data of Pt (II) L complex**

| Wavenumber (cm⁻¹) | Intensity | Assignment / Functional Group |
| --- | --- | --- |
| ~3430 | Broad | O–H or N–H stretching (hydrogen bonded) |
| ~3060 | Strong | Aromatic C–H stretching |
| ~1600 | Medium | C=N stretching (imine group) |
| ~1500 | Medium | Aromatic C=C stretching |
| ~1240 | Medium | C–O or C–N stretching |
| 750–850 | Medium | Aromatic C–H bending |


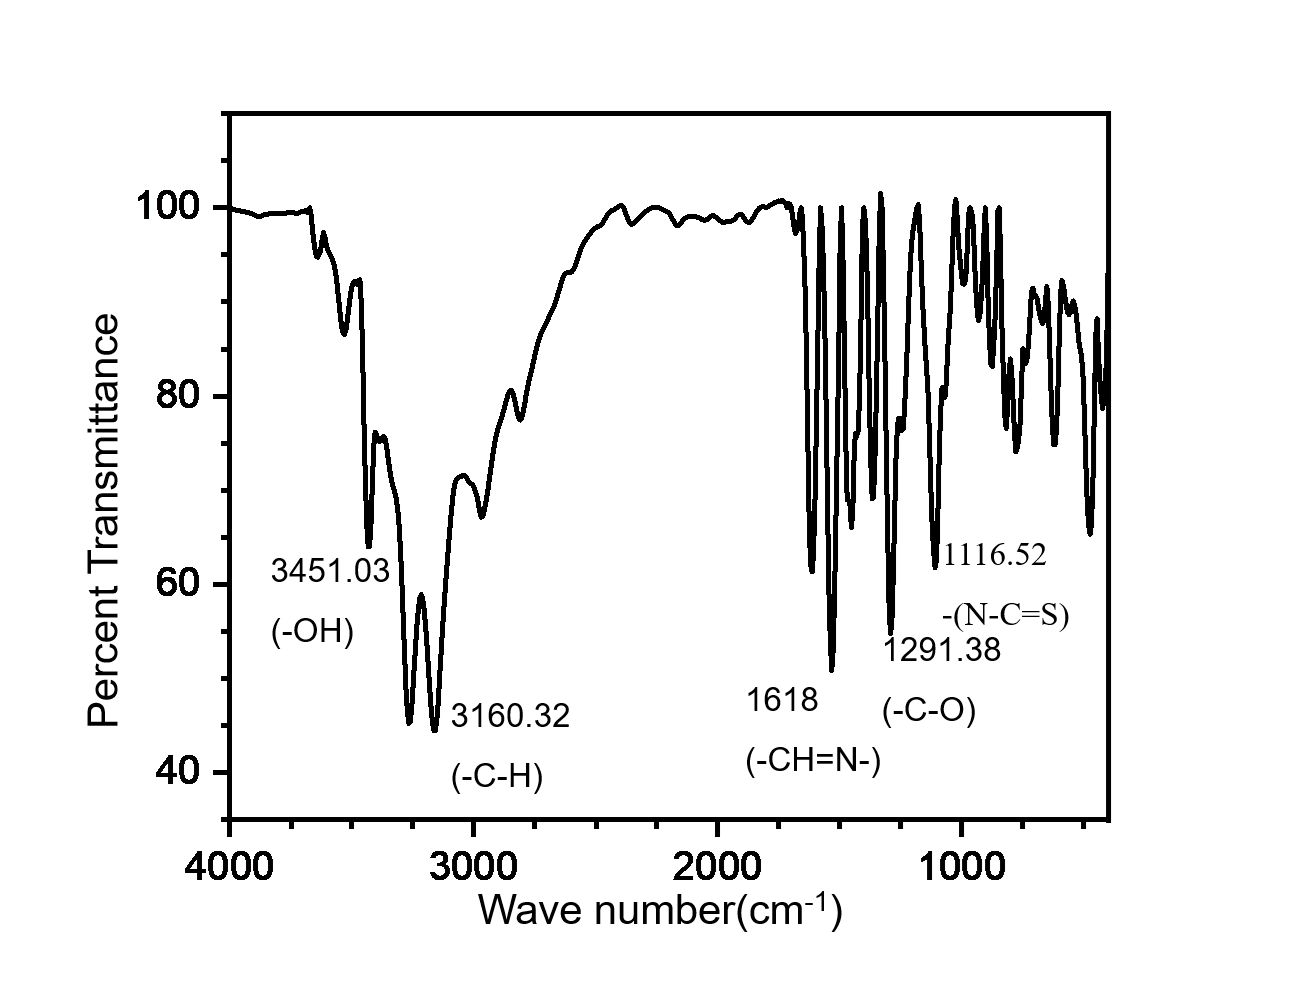


**Supplementary Information (SI 3)**. ¹H-NMR Spectral Data of Ligand L

| **δ (ppm)** | **Multiplicity** | **Integration** | **Assignment** |
| --- | --- | --- | --- |
| **11.63** | br s | 1H | OH/NH (exchangeable) |
| **8.56–8.16** | m | 3H | Aromatic or imine |
| **7.82–7.37** | m | 3H | Aromatic protons |
| **3.85–3.17** | m | 2H | CH₂ or OCH₃ |
| **2.51** | s | — | DMSO-d₆ solvent peak |
| **1.05** | t | 3H | Methyl (–CH₃) |


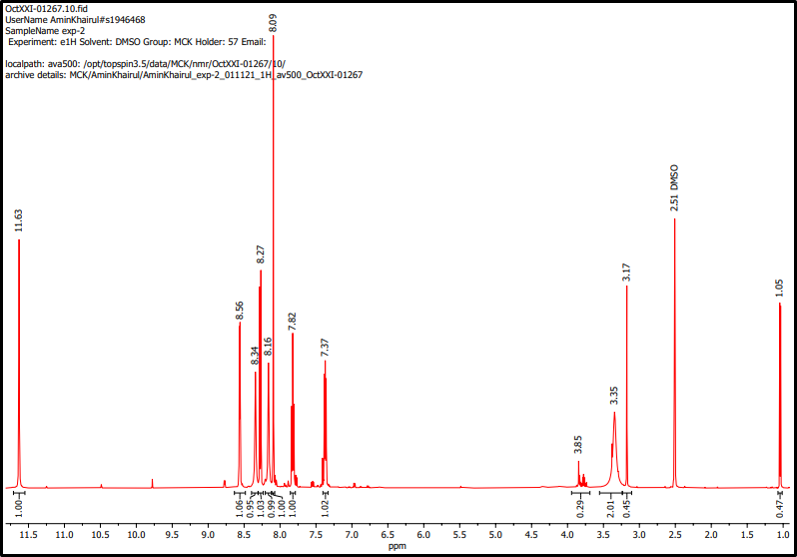


**Supplementary Information (SI 4 Fig).** Uncropped **g**el image for Fig 3E

Gel electrophoresis DNA fragmentation

control

treatment

DNA Ladder 1kb


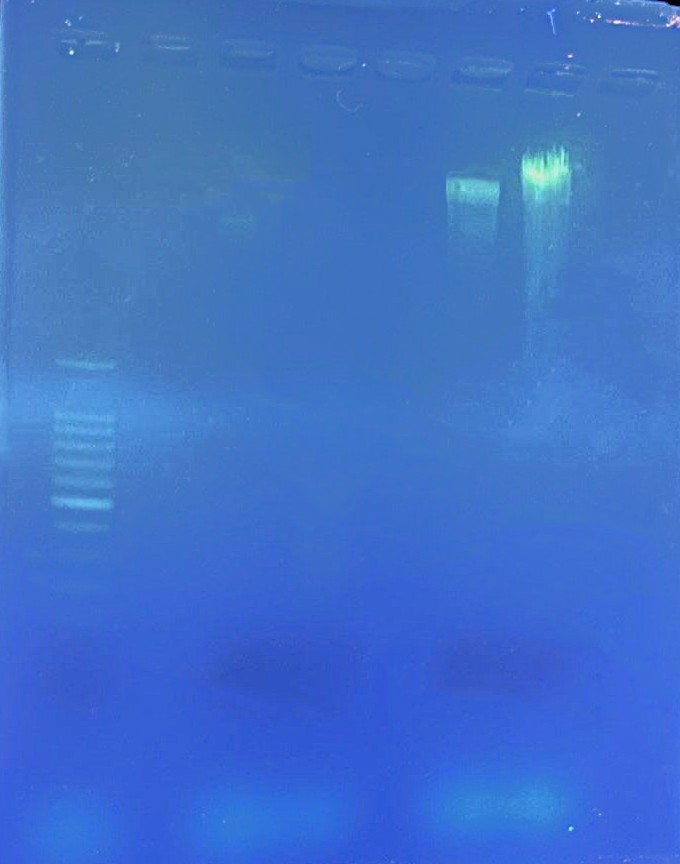


**Supplementary Information (SI 5 Fig).** Unprocessed **g**el image for Fig 5B

Gel electrophoresis of platinum complex RT-PCR products


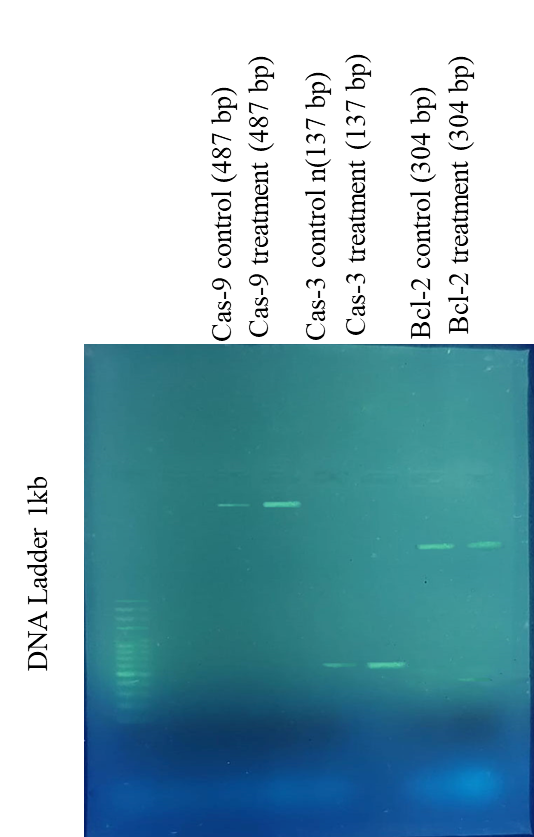


DNA Ladder 1kb

p53 control(458 bp)

p53 treatment (458 bp)

Bax treatment (479 bp)

GAPDH treatment (475 bp)

Bax control (479 bb)

GAPDH control (475 bp)


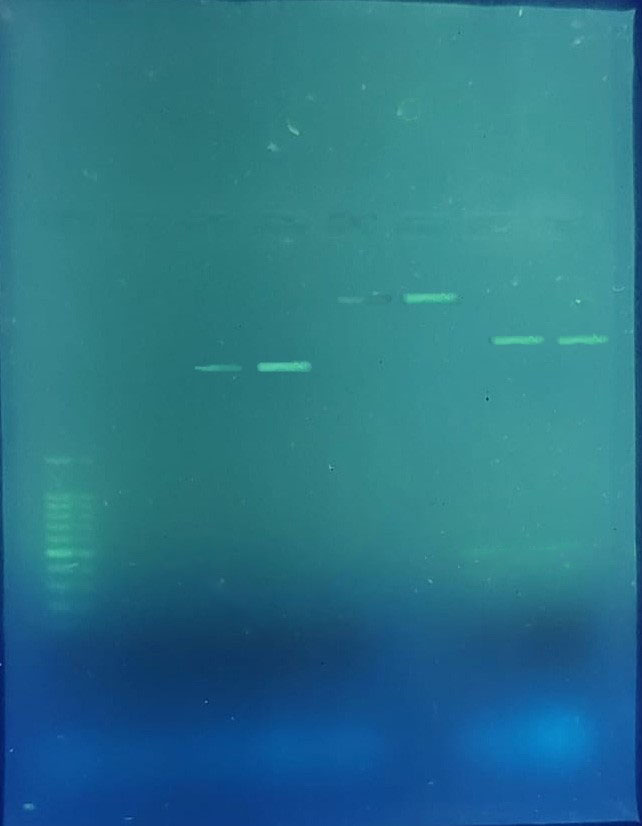

Supplement: Supplementary file 1 [file ff3b75f95527479b7674b068.docx]
